# Supplementary material for: Cytochrome P450-dependent reactive oxygen species (ROS) production contributes to Mn3O4 nanoparticle-caused liver injury
Source: Royal Society of Chemistry journal article supplement (doi:10.1039/c8ra05633a), 2018-01-01
Supplement: c8ra05633a1.pdf [file c8ra05633a1.pdf]

**Supporting Information**

**Cytochrome P450-dependent reactive oxygen species (ROS)  
production contributes to Mn<sub>3</sub>O<sub>4</sub> nanoparticle-caused liver  
injury**

Zongkai Yue<sup>a</sup>, Xiao Zhang<sup>a</sup>, Qilin Yu<sup>b</sup>, Lu Liu<sup>c</sup>, Xiaomeng Zhou<sup>a, \*</sup>

*<sup>a</sup>Center for Aircraft Fire and Emergency, Civil Aviation University of China, Tianjin 300300, PR China*

*<sup>b</sup>Ministry of Education Key Laboratory of Molecular Microbiology and Technology, College of Life Science, Nankai University, Tianjin 300071, PR China*

*<sup>c</sup> Tianjin Key Laboratory of Environmental Remediation and Pollution Control, College of Environmental Science and Engineering, Nankai University, Tianjin 300071, P.R. China*

\*Corresponding author at: Center for Aircraft Fire and Emergency, Civil Aviation University of China, Tianjin 300300, PR China

*E-mail address:* zhouxm@nankai.edu.cn (X. Zhou).

## Evaluation of CYP1A2 activity assays

CYP1A2 activity assays were detected by the formation rate of acetaminophen which is the production of phenacetin.<sup>1</sup> Microsomal proteins were incubated in a mixture (total volume of 0.2 ml) containing 0.1 mol/L PBS buffer (pH 7.4), 12  $\mu$ L NADPH, and increasing concentrations of phenacetin. Reactions were started by the addition of microsomes, following thermal equilibration at 37°C of incubation mixtures. They were conducted in a shaking water bath at 37°C in aerobic conditions and stopped after 5 min by adding 0.2 ml of ice-cold acetonitrile. Denatured proteins were then removed by centrifugation for 10 min at 12,000 r/nin and an aliquot (0.1ml) of the supernatant was analyzed by HPLC with UV detection,

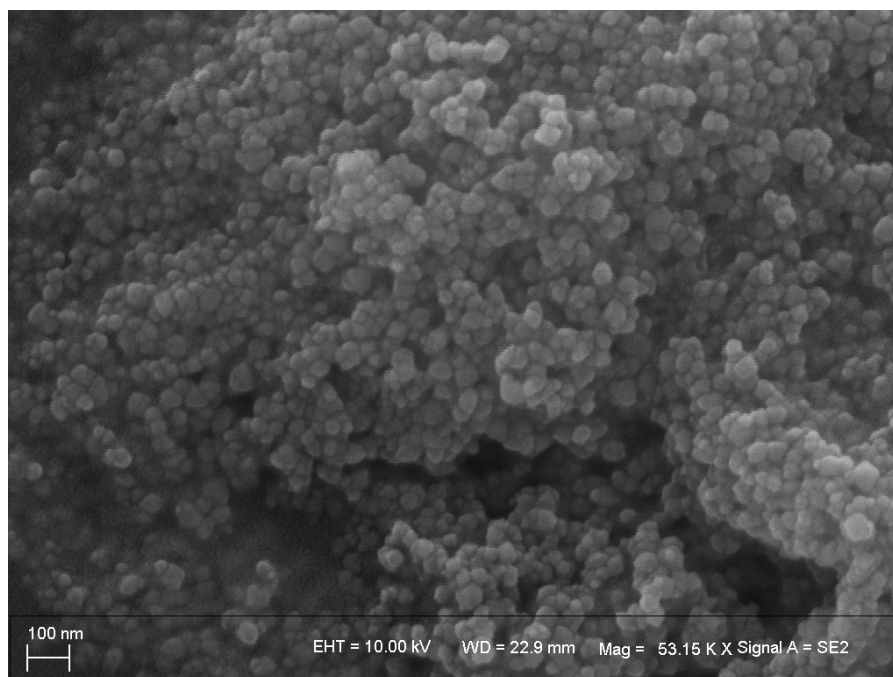

Fig. S1 SEM observation of the synthesized Mn<sub>3</sub>O<sub>4</sub> NPs.

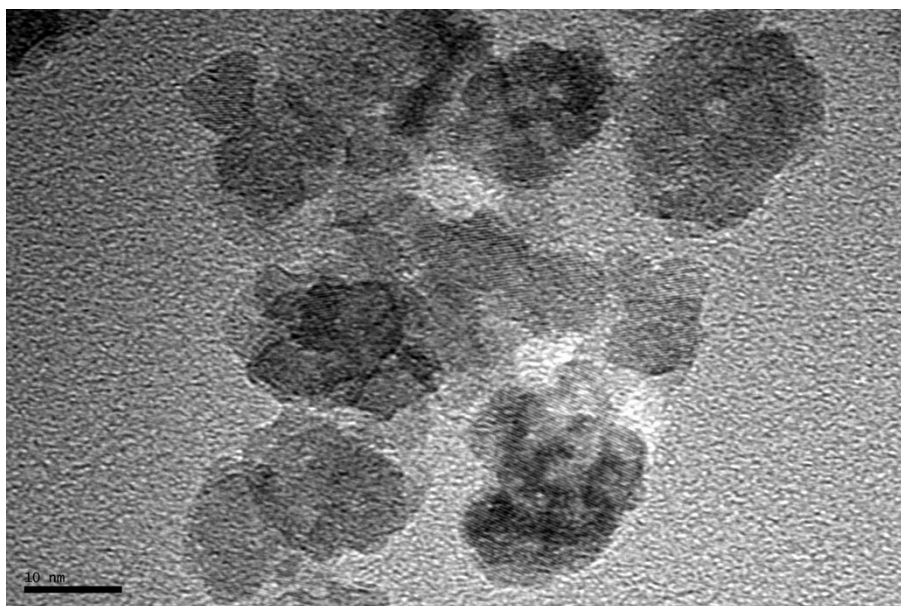

Fig. S2 TEM observation of the synthesized Mn<sub>3</sub>O<sub>4</sub> NPs.

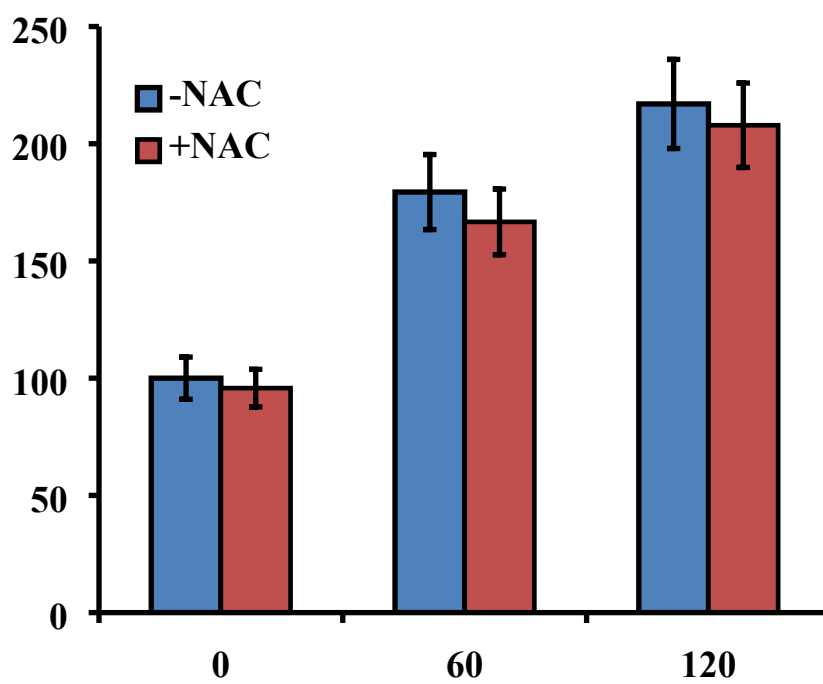

Fig. S3 Contents of CYP1A2 activity assays in the livers.

[1] L. Quintieri, P. Palatini, A. Nassi, Flavonoids diosmetin and luteolin inhibit midazolam metabolism by human liver microsomes and recombinant CYP3A4 and CYP3A5 enzymes [J]. *Biochem. Pharmacol.*, 2008, **75**, 1426-37.
